# Identification of microbial exopolymer producers in sandy and muddy intertidal sediments by compound-specific isotope analysis.

Cédric Hubas<sup>1,\*</sup>, Julie Gaubert-Boussarie<sup>1</sup>, An-Sofie D'Hondt<sup>2</sup>, Bruno Jesus<sup>3</sup>, Dominique Lamy<sup>4,5</sup>, Vona Meleder<sup>3</sup>, Antoine Prins<sup>1,3</sup>, Philippe Rosa<sup>3</sup>, Willem Stock<sup>2</sup>, and Koen Sabbe<sup>2</sup>

<sup>1</sup>Laboratoire de Biologie des Organismes et Ecosystèmes Aquatiques (BOREA) Muséum National d'Histoire Naturelle, CNRS, Sorbonne Université, IRD, Université des Antilles, Université de Caen Normandie; Station Marine de Concarneau, Place de la croix, 29900, Concarneau, France

<sup>2</sup>Department of Biology, Research Group Protistology and Aquatic Ecology, Ghent University, Krijgslaan 281/S8, 9000, Belgium

<sup>3</sup>Nantes Université, Institut des Substances et Organismes de la Mer, ISOMer, UR 2160, F-44000 Nantes, France

<sup>4</sup>Laboratoire de Biologie des Organismes et Ecosystèmes Aquatiques (BOREA) Muséum National d'Histoire Naturelle, CNRS, Sorbonne Université, IRD, Université des Antilles, Université de Caen Normandie; Jardin des plantes, Bâtiment arthropodes, Paris, France

<sup>5</sup>Institute of Ecology and Environmental Sciences of Paris (iEES-Paris), Sorbonne Université, Univ Paris Est Créteil, IRD, CNRS, INRA, 4 place Jussieu, 75005 Paris, France

1 **Extracellular polymeric substances (EPS) refer to a wide variety of high molecular weight molecules secreted outside the cell membrane by biofilm microorganisms. In the present study, EPS from marine microphytobenthic biofilms were extracted and their isotope ratios were analysed. A comparison of these ratios with the carbon isotope ratios of fatty acid biomarkers allowed the identification of the main EPS producers of two contrasting types of intertidal marine sediments. Our study reveals that EPS production and degradation are supported by very different communities in muddy and sandy sediments and that EPS sources are more diverse in the sand. In mud, bound EPS are mainly derived from diatoms, while colloidal EPS are the result of degradation of bound exopolymers by certain specialised bacteria. In sand, bound EPS are rather of bacterial or cyanobacterial origin and diatoms contribute mainly to colloidal EPS. These differences are thought to be related to differences in the functioning of the epipelagic and epipsammic communities and in particular to the use of EPS either for motility or for cell attachment purposes.**

20 **Extracellular Polymeric Substances | Stable isotopes | compound specific isotope analysis | fatty acids**

22 **Corresponding author: [cedric.hubas@mnhn.fr](mailto:cedric.hubas@mnhn.fr)**

## 23 Introduction

24 The term extracellular polymeric substances (EPS) is generic and refers to a wide variety of macromolecules whose main characteristic is to be of high molecular weight (> 10 kDa) and secreted by microbes outside the cell membrane. In intertidal sediments, these molecules are, for instance, secreted as a protection in response to changing environmental conditions or to allow cell motility (1). But these secretions can also indirectly serve a number of ecosystem functions such as increasing the cohesion and adhesion properties of sediments (2), or providing a significant source of organic matter at the base of the food web (3, 4). They also represent a privileged pathway for cooperation between ecosystem engineers, leading to an improvement of the engineering effects on benthic communities (5).

38 Although many authors have studied these compounds and reviewed their multiple roles in aquatic ecosystems (6–10), there is currently no clear classification.

39 As a general rule, exopolymers are classified into three categories which are basically distinguished by the proximity of the polymers to the membrane of the producing cells. This lack of homogeneity in the terms is most probably related to the high chemical diversity and complexity of EPS.

40 Capsular polymer substances (CPS) are often defined as linked to the cell surface by a covalent bond to phospholipid or lipid A molecules, whereas EPS are released on the cell surface without being chemically attached to it and are often excreted to form a matrix more or less adherent to the surfaces (9). EPS are further separated in two distinct fractions: bound-EPS which are tightly-bound long-chain material, and colloidal-EPS which are less refractory, small chain, easily extractable molecules. Colloidal EPS can be extracted by water at room temperature, while bound-EPS extraction requires hot water or bicarbonate (8) or even cationic resins that trap the bivalent cations linking the EPS together, allowing the extraction of bound compounds (11). Thus, EPS are also sometimes described according to the extraction procedures. For instance, hot-bicarbonate and hot-water EPS (EPS<sub>HB</sub>, EPS<sub>HW</sub>), correspond to insoluble compounds solubilised using hot bicarbonate or water extraction protocols (12, 13).

41 These different EPS fractions differ in their biochemical composition (14) and it has been shown that different types of diatom-derived EPS drive changes in heterotrophic bacterial communities in intertidal sediments (15, 16).

42 The most significant progress on the subject concerns bacterial exopolysaccharides from microbial cultures (in particular pathogenic microorganisms), whose EPS metabolism and regulation mechanisms have been very well described. The genomic characterisation of these bacterial models of interest has led to fascinating discoveries. For example, it has been shown that EPS production (which underlies the development of bacterial biofilms) is under close control of a social

behaviour called Quorum Sensing that allows interactions between members of microbial communities (17, 18). Quorum sensing is based on the production and release of signalling molecules called autoinducers, which increase in concentration as a function of cell density (19). It was shown that these compounds were also present and particularly diverse in microbial mats (20, 21).

However, in the natural environment, the precise composition of EPS is still largely unknown. <sup>13</sup>C-labelling experiment have highlighted the role of diatom organic matter as a growth substrate for benthic bacteria (3, 22, 23). These studies traced diatom carbon and found that diatom EPS likely represents a link between benthic microalgae and higher trophic levels. Furthermore, the precise origin of these compounds in intertidal food webs is still subject to debate. Are diatoms the main, if not the only, producers of EPS in microphytobenthic assemblages, or do exopolymers present themselves rather as a pool of extracellular compounds of diverse origin?

In this study, we extracted colloidal and bound EPS from intertidal biofilms and analysed the natural stable isotope ratios (SIR) of carbon ( $\delta^{13}\text{C}$ ) and nitrogen ( $\delta^{15}\text{N}$ ). Isotope ratios of EPS were compared to those of fatty acid biomarkers to determine which microorganisms were primarily responsible for the production of EPS in muddy and sandy sediments.

Fatty acids are well recognised chemotaxonomic markers although they have a very limited taxonomic resolution and are hardly exclusive of a given organism (24). However, the ratios between the different fatty acids have shown convincing results in the identification and quantification of algal and bacterial groups and have already been successfully used to determine the composition of microbial mat (25) and sediment microbial communities (14, 26–28).

The aim of this study was therefore to compare data of the natural stable isotopes of EPS with those of fatty acid biomarkers in two sediment types representative of intertidal environments (i.e. a muddy site and a sandy site), in order to accurately identify the main exopolymer producers and to determine whether EPS production and dynamics was comparable between the microbial communities of contrasting sediment types.

## Material and methods

**Sampling site.** The sediment sampling took place in June 2017 at 2 tidal flat sites in France near La Coupelasse (Baie of Bourgneuf, France, Fig. 1). Bourgneuf Bay is a macrotidal bay located south of the Loire estuary on the French Atlantic coast, containing large intertidal mudflats (100 km<sup>2</sup>) colonized by microphytobenthic biofilms. The site is characterised by the extensive aquaculture of the Pacific oyster *Crassostrea gigas*. Oyster farms cover about 10 % of the intertidal area, while most of the rocky areas (about 17 % of the intertidal area) are colonized by wild oysters (29) or macroalgae (30, 31). Two contrasting sites were selected: a muddy site (47°0'53.326"N, 2°1'24.919"W) characterised by epipellic diatom communities and a high mud content (i.e. 50-90%, (32)) and a sandy site (47°0'57.453"N, 2°1'33.676"W) characterised by epipsammic diatom communities and a low mud content (i.e. 40-60%, (33)). The muddy site was sampled 4 times between 23<sup>th</sup> and 28<sup>th</sup> June 2017 (between 5 and 12 replicates depending on the date) while the sandy site was sampled 3 times (between 4 and 10 replicates)

2°1'33.676"W) characterised by epipsammic diatom communities and a low mud content (i.e. 40-60%, (33)). The muddy site was sampled 4 times between 23<sup>th</sup> and 28<sup>th</sup> June 2017 (between 5 and 12 replicates depending on the date) while the sandy site was sampled 3 times (between 4 and 10 replicates)

**Exopolymeric substances (EPS).** Colloidal EPS were extracted by rotating sediment (for each sampling occasion, replicates of sediment core 10 cm diameter, 0.5 cm depth) in artificial sea water (salinity 30, Sea salts, NutriSelect® Basic) 1.5h at 4°C. Samples were then centrifuged (1500 g, 15 min) and the supernatant retrieved. Bound EPS were thereafter recovered by adding 2g of a previously PBS-activated (4°C) Dowex Marathon C resin (sodium form, Sigma-Aldrich, Inc.) to the remaining pellet. After homogenisation, a second extraction was performed by rotating in artificial sea water 1.5 h at 4°C. Samples were then centrifuged (1500 g) again and the supernatant retrieved. Both supernatants form respectively the colloidal and bound fraction of EPS and were freeze-dried. Freeze-dried colloidal and bound EPS were weighted (in average 60 ± 11 mg) and the whole content was encapsulated in tin (Sn) capsules. They were placed in a 96 wells tray and analysed by an Elementar Vario EL Cube or Micro Cube elemental analyzer (Elementar Analysensysteme GmbH, Hanau, Germany) interfaced to either an Isoprime VisION IRMS (Elementar UK Ltd, Cheadle, UK) or a PDZ Europa 20-20 isotope ratio mass spectrometer (Sercon Ltd., Cheshire, UK) by UC Davis Stable Isotope Facility. Samples were combusted at 1080°C in a reactor packed with chromium oxide and silvered copper oxide. Following combustion, oxides were removed in a reduction reactor (reduced copper at 650°C). The helium carrier then flows through a water trap (magnesium perchlorate and phosphorous pentoxide). CO<sub>2</sub> is retained on an adsorption trap until the N<sub>2</sub> peak is analyzed; the adsorption trap is then heated releasing the CO<sub>2</sub> to the IRMS.

In parallel, carbohydrate and protein concentrations were measured following the phenol assay protocol (34) and the Lowry procedure (35), respectively. For carbohydrate analyses, 200 µl phenol (5%) and 1 mL sulphuric acid (98%) were added to 200 µl of previously extracted colloidal and bound supernatants. They were then incubated for 35 min at 30°C and the carbohydrate concentration was measured using a spectrophotometer (Milton Roy Spectronic Genesys 2). The optical density of the solution was measured at 488 nm. For protein analyses, 250 µl subsamples were incubated for 15 min at 30°C with 250 µl of 2% sodium dodecyl sulphate salt (SDS) and 700 µl of a chemical reagent prepared as described in (35). The subsamples were then incubated for another 45 min at 30°C with 100 µl of Folin reagent (diluted with distilled water 5:6 v/v). The protein concentration was measured by spectrophotometry at 750 nm. Calibration curves were prepared using glucose and bovine serum albumin (BSA) as standards for carbohydrates and proteins, respectively.

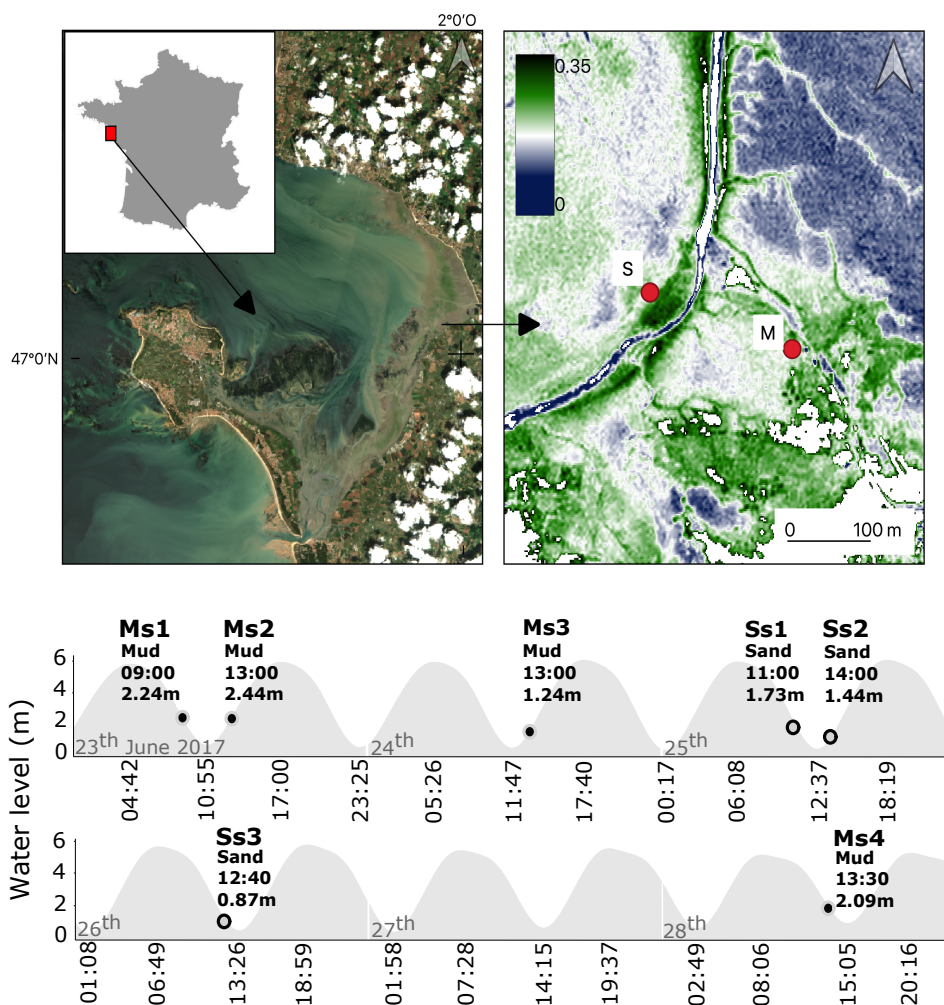

**Fig. 1.** Studied area. (top panel) Map of Bourgneuf Bay (France) and location of the sampling sites. left = true colors, right = Normalized difference vegetation index (NDVI); (bottom panel) sampling occasions according to the tidal level at the study sites (data provided by the Naval Hydrographic and Oceanographic Service (SHOM) for coordinates: 047°06'00.0"N, 002°07' 00.0"W (Pornic). The first capital letter indicates the type of sediment (M=mud, S=sand), the other letters indicate the sampling point.

186 **Fatty acid extraction.** Fatty acid (FA) analysis was per- 207  
 187 formed on triplicates of sediment core 10 cm diameter, 0.5 208  
 188 cm depth) following the method of (36) as modified by (37) 209  
 189 and (14). Lipids were extracted with a 20 min ultrasonication 210  
 190 (sonication bath, 80 kHz, Fisherbrand™) in a mixture of dis- 211  
 191 tilled water, chloroform and methanol in ratio 1:1:2 (v:v:v, in 212  
 192 mL). Lipids were concentrated under  $N_2$  flux, and saponi- 213  
 193 fied, in order to separate FA, with a mixture of NaOH (2 214  
 194  $\text{molL}^{-1}$ ) and methanol (1:2, v:v, in mL) at 90 °C during 90 215  
 195 min. Saponification was stopped with 500  $\mu\text{L}$  hydrochloric 216  
 196 acid. Samples were then incubated with BF<sub>3</sub>-methanol at 90 217  
 197 °C during 10 min to transform free fatty acids into fatty acid 218  
 198 methyl esters (FAME), which were isolated and kept frozen 219  
 199 in chloroform. Just before analysis, samples were dried under 220  
 200  $N_2$  flux and transferred to hexane. 221

201 **Compound specific isotope analysis (CSIA) of FAME.** 223  
 202 Carbon stable isotope ratios (expressed in ‰) of individual 224  
 203 fatty acids were measured by gas-chromatography-isotope 225  
 204 ratio mass spectrometry (GC-IRMS). Measurements were 226  
 205 performed at the Stable Isotope Platform of the European In-  
 206 stitute for Marine Studies (IUEM, Brest, France). FAMES

were injected in splitless mode and separated using a B5HT column (30 m × 0.25 mm ID × 0.2  $\mu\text{m}$ , Phenomenex) with a Thermo Fisher Scientific TRACE GC ULTRA equipped with GC isolink combustion, Conflo IY interace and Delta V plus (Thermo Fisher Scientific) isotope ratio mass spectrometer (IRMS). Fatty acids were converted into CO<sub>2</sub> by combustion in the ISOLINK furnace and transferred to the CONFLO IV interface and then introduced to the IRMS. Fatty acid methyl esters were identified by comparison of their retention time with those of commercial standards and in-house standard mixtures. Both FA 18:1n-9 and 18:3n-3 co-eluted and were analysed simultaneously. Fatty acids kept for  $\delta^{13}\text{C}$  analyses were selected based on their abundance and detection in CSIA (i.e., with amplitudes > 800 mV). Stable carbon isotope ratios for individual FA were calculated from FAME data by correcting for the one carbon atom in the methyl group that was added during the derivatization process. This correction was made according to (38) by taking into account the isotope ratio of the derivatized methanol (BF<sub>3</sub> methanol), and the fractional carbon contribution of the free FA to the ester.

$$\delta^{13}\text{C}_{FA} = \frac{(\delta^{13}\text{C}_{FAME} - (1-f)\delta^{13}\text{C}_{CH_3OH})}{f} \quad (1)$$

where  $\delta^{13}\text{C}_{FA}$  and  $\delta^{13}\text{C}_{FAME}$  (in ‰) are the isotopic composition of the free FA, and the FA methyl ester respectively,  $f$  is the fractional carbon contribution of the free FA to the ester and  $\delta^{13}\text{C}_{CH_3OH}$  is the isotopic composition of the methanol derivatization reagent (-39.1 ‰).

**Fatty acid identification.** Identification of the samples was performed using a gas chromatograph coupled to mass spectrometer (GC-MS, Varian 450GC with Varian 220-MS). Compounds annotation was performed by comparing mass spectra with NIST 2017 library. Corresponding fatty acids are designated as X:Yn-Z, where X is the number of carbons, Y the number of double bonds and Z the position of the ultimate double bond from the terminal methyl.

**Statistical analyses.** Univariate statistics were carried out by checking the normality of the data per group (Shapiro test) and the homogeneity of the variances (Bartlett or Levene test). Where the data did not meet these criteria or the sample size were too small, we applied van der Waerden normal scores test followed by Fisher's least significant difference (LSD) post-hoc test. In case the sample size was larger but the conditions were still not met, we used Permutation one-way Welch's Anova followed by Tukey HSD posthoc test. In case we had to compare two samples, we checked for normality and equality of variance (Fisher-Snedecor test) and used Welch's permutation t-test or student t-test. All analyses were performed using R version 4.0.3 using the "stats" package. We performed a smoothed density estimation on the fatty acid isotope ratio data using the `geom_smooth` function of the "ggplot2" package. The function, computed and drawn kernel density estimate based on the observed distribution of the stable isotopes ratio. Data are available at <https://doi.org/10.5281/zenodo.7351530>. Statistical scripts and command lines are available on [GitHub](https://github.com) at the following address <https://doi.org/10.5281/zenodo.7387066>.

## Results and discussion

In the present study, compound-specific isotope analysis (CSIA) of fatty acid biomarkers was used to infer about possible origin of microbial EPS. Our main assumption was that isotopic fractionation between the microorganisms and the product of their metabolism (i.e. EPS, fatty acids) is null or negligible. At present, no study has been able to demonstrate with certainty whether this hypothesis is true or false. There is, however, evidence that fractionation exists between microorganisms and their food sources. In bacteria, substantial isotopic fractionation has been shown between biomarker lipids and their growth substrate (39) with bacterial biomarkers being significantly depleted in  $^{13}\text{C}$  compared to the food source. In *Escherichia coli*, respired  $\text{CO}_2$  was 3.4‰ depleted in  $^{13}\text{C}$  relative to glucose (used as the carbon source) although total cellular carbon was only 0.6‰ depleted in  $^{13}\text{C}$ ,

**Table 1.** Comparison of Carbon and Nitrogen contents and isotopic ratios of colloidal and bound EPS in mud and sand using the van der Waerden (Normal Scores) non parametric test. df = degree of freedom. Results of the post-hoc test using the criterion Fisher's least significant difference (LSD) are shown in Fig. 2

| Variable              | $\chi^2$ | df | p-value     |
|-----------------------|----------|----|-------------|
| Carbon content        | 46.83024 | 13 | 1.03209e-05 |
| Nitrogen content      | 27.364   | 14 | 6.74533e-06 |
| $\delta^{13}\text{C}$ | 36.31005 | 13 | 0.00053     |
| $\delta^{15}\text{N}$ | 35.02141 | 13 | 0.00084     |

and lipid fractions by 2.7‰ (40). But to date however, there is no evidence in the literature that the same phenomenon exists between microorganisms and their metabolites.

**Elemental EPS compositions.** Carbon and nitrogen contents were significantly different between sites as well as between bound and colloidal EPS (table 1, Fig. 2). Bound EPS were almost always richer in carbon and nitrogen than colloidal EPS (fig. 2a,c). The only noticeable exception was at Ms1. We also noted a very significant decrease in the N and C contents in the colloidal fraction at this site (i.e. muddy site) between Ms1 and Ms2. Both were sampled the same day but respectively at ebbing and rising tide. These findings are partly consistent with those of Hanlon et al. (13). During periods of diurnal emersion at a muddy site, these authors reported that bacteria converted bound EPS into more labile colloidal EPS. By analogy, we can hypothesise that bacteria at our site were very efficient at converting bound EPS to colloidal EPS (hence the slight decrease in N and C content in bound EPS) but that they probably also consume colloidal EPS at very high rates.

The same patterns were observed for sugar and protein concentrations measured by colorimetry, but with greater variability between measurements (supplementary figure SF1). If we focus on colloidal EPS, we notice that the consumption of these between Ms1 and Ms2 mainly concerned carbohydrates. Exopolymers are mainly composed of carbohydrates and proteins (10) which therefore represent the main sources of C and N in EPS. Overall, bacterial EPS contain more proteins and higher molecular diversity than diatomaceous EPS (41). The carbohydrates produced by microphytobenthos are mainly heteropolymers, with a large diversity of molecules. They range in molecular weight from few monosaccharides to highly complex molecules whose relative proportion in terms of monomers determines the physicochemical structure and hydrophobic characteristics of the EPS matrix (8, 14). The higher C content of the EPS is therefore probably partly related to a higher proportion of sugars of diatom origin.

**EPS isotopic compositions.** At the muddy site, bound EPS were always  $^{13}\text{C}$  or  $^{15}\text{N}$  depleted in comparison to colloidal EPS at this site (Fig. 2b,d). At the sandy site, the same pattern is observed but both nitrogen and carbon stable isotope ratio showed a higher variability.

All sampling dates together,  $\delta^{13}\text{C}$  (Fig. 3a, top panel) and  $\delta^{15}\text{N}$  values were significantly different between bound and colloidal EPS at the muddy site (Permutation two Sample t-tests,  $\delta^{13}\text{C}$ :  $t = -10.678$ ,  $p\text{-value} = 0.002$ ;  $\delta^{15}\text{N}$ :  $t = -4.4325$ ,

323 p-value = 0.002).  
324 At the sandy site,  $\delta^{13}\text{C}$  values were also significantly dif-  
325 ferent (Fig. 3a, bottom panel) between bound and colloidal  
326 EPS (two Sample Student's t-test,  $t = -4.9474$ ,  $df = 22$ ,  $p$ -  
327 value =  $5.984\text{e-}05$ ) but  $\delta^{15}\text{N}$  was not significantly different  
328 (two Sample Student's t-test,  $t = -0.97547$ ,  $df = 22$ ,  $p$ -value =  
329  $0.3399$ ).

330 All sampling dates grouped together  $\delta^{13}\text{C}$  between bound  
331 and colloidal EPS were thus always significantly different at  
332 both sites (Fig. 3a), indicating that these two fractions were  
333 from different EPS producers. Comparison with the literature  
334 is difficult as it is the first time that C and N natural stable iso-  
335 topes ratio are reported on intertidal bound and colloidal EPS.  
336 The values reported in the literature for the main monosac-  
337 charides constituting the extracellular sugars are however in  
338 agreement with our results (i.e. a natural  $\delta^{13}\text{C}$  of  $-15$  to  $-18$   
339 ‰) (23)

340 **Carbon isotope ratio of fatty acid classes.** In sandy sed-  
341 iment  $\delta^{13}\text{C}$  were significantly different between fatty acids  
342 classes ( $F = 23.128$ ,  $df1 = 3$ ,  $df2 = 109$ ,  $p = 1.16 \times 10^{-11}$ )  
343 and showed a gradual  $^{13}\text{C}$  enrichment (Fig. 3b) from  
344 branched fatty acids (BFA) to mono- (MUFA) and poly-  
345 unsaturated (PUFA) fatty acids. Such differences were not  
346 observed in the muddy site. In the mud,  $\delta^{13}\text{C}$  of BFA,  
347 saturated (SFA) and MUFA were not significantly different.  
348 Only PUFA showed a slightly higher mean  $\delta^{13}\text{C}$  (Permuta-  
349 tion one-way Welch Anova followed by Tukey HSD posthoc  
350 test,  $F = 33.588$ ,  $p < 2.2 \times 10^{-16}$ ).

351 In comparison with similar ecosystems (i.e. intertidal muddy  
352 sediments), the isotope ratios of the main fatty acids are quite  
353 consistent. Previous studies recorded  $\delta^{13}\text{C}$  ranging from  $-16$   
354 to  $-21\text{‰}$  for branched,  $-14$  to  $-26\text{‰}$  for saturated,  $-13$  to  $-22\text{‰}$   
355 for monounsaturated and  $-15$  to  $-22\text{‰}$  for polyunsaturated  
356 fatty acids (3, 22, 42). Taylor et al. (42) also showed that  
357 natural carbon isotope ratios were highly variable even over  
358 relatively short periods (i.e. 30h). These changes indicate  
359 that subtle modifications in the metabolic processes of carbon  
360 assimilation as well as interactions between microorganisms  
361 can take place over very short periods and could explain the  
362 variability of our  $\delta^{13}\text{C}$  values.

363 The tetracosanoic acid (SFA, 24:0) was excluded from the  
364 above mentioned analyses as it increased dramatically the  
365 variability because of extreme and unusually negative  $\delta^{13}\text{C}$   
366 values indicative of a specific metabolism. The mean  $\delta^{13}\text{C}$   
367 of 24:0 was  $-66.89 \pm 35.84\text{‰}$  and  $-59.24 \pm 71.82\text{‰}$  in  
368 the mud and sand respectively. It also sometimes showed  
369 a plurimodal distribution (as shown by density plots figure  
370 4b) which indicate that 24:0 had likely varied microbial ori-  
371 gins. This particular fatty acid was the only one to show ex-  
372 tremely low  $\delta^{13}\text{C}$  values in line with the isotopic ratios gener-  
373 ally found in methane-rich ecosystems for which direct links  
374 could be established between  $\delta^{13}\text{C}$  values and the presence  
375 of methane-oxidizers in bacterial communities (43, 44). It is  
376 indeed possible that the 24:0 originated from anaerobic bac-  
377 teria related to the oxidation of methane or the sulphur cycle.  
378 The most negative  $\delta^{13}\text{C}$  values were recorded in highly re-  
379 duced muddy sediments. Unfortunately, it is not possible to

380 establish a direct link in our study.

**Biomarkers revealed contrasting EPS producers be-  
tween sites.** The  $\delta^{13}\text{C}$  values of fatty acid biomarkers were  
measured at each site. By comparing the distribution of in-  
dividual fatty acids (Fig. 4a-d) with the carbon isotope ra-  
tio of the EPS (Fig. 4e), it was relatively straightforward  
to determine which fatty acids had an isotope ratio clos-  
est to that of bound and colloidal EPS. Based on figure 4  
and taking into account the quality of the alignment between  
fatty acids and EPS, a detailed literature review of the poten-  
tial origins of EPS in the studied sediments was performed.  
The result is available in the supplementary table ST1. The  
analysis revealed that EPS producers were very different be-  
tween the two sites. In the mud, colloidal EPS were poten-  
tially mainly produced by bacteria, whereas bound EPS were  
mainly produced by diatoms with a significant contribution  
from cyanobacteria and bacteria. In the sand, the origins of  
EPS were more diversified. Colloidal EPS were mainly pro-  
duced by diatoms and bacteria with a potential contribution  
from cyanobacteria. Bound EPS were mainly produced by  
bacteria. The sediments of the study site are, indeed, known  
to harbour microphytobenthic assemblages dominated by di-  
atoms (i.e. 97% (33)). Depending on the site, these are  
accompanied by cyanophyceae, euglenophyceae and chloro-  
phyceae (33).

**Epipellic and epipsammic diatoms contributed differ-  
ently to the EPS chemistry.** Most common fatty acids in  
diatoms are myristic acid (14:0), palmitic acid (16:0), palmi-  
toleic acid (16:1n-7), docosahexaenoic acid (DHA, 22:6n-3),  
and eicosapentaenoic acid (EPA, 20:5n-3) (45). In terms of  
relative proportions, however, 16:1n-7 and 20:5n-3 generally  
dominate the total fatty acids (46). These two fatty acids  
had relatively close  $\delta^{13}\text{C}$  values that best aligned respec-  
tively with bound EPS in muddy sediments ( $-20.3 \pm 1.1\text{‰}$ )  
and with colloidal EPS ( $-13.4 \pm 4.5\text{‰}$ ) in sandy sediments.  
This indicated a very different functioning between the as-  
semblages at these two sites.

The muddy site had an epipellic community typical of  
these environments (presence of characteristic migratory be-  
haviour, pers. obs.) whereas the sandy site has all the char-  
acteristics of epipsammic communities (33). Thus it appears  
that epipellic diatoms mainly contributed to the bound EPS  
fraction while epipsammic diatoms mainly contributed to the  
colloidal EPS pool. This differential contribution according  
to habitat can be explained by the implementation of different  
adaptation strategies of diatoms to environmental parameters.  
Epipellic diatoms secrete large quantities of extracellular ex-  
opolymers that are involved in motility. Mucilage is secreted  
from the raphe and adheres to the sediment following hydra-  
tion. Cellular movement is then generated when the EPS  
associated with the trans-membrane complexes is displaced  
along the raphe line by actine microfilament bundles (8, 47).  
The products necessary for the migration of the diatoms are  
therefore secreted and used in the immediate vicinity of the  
cell. This is most probably the reason why we observed a

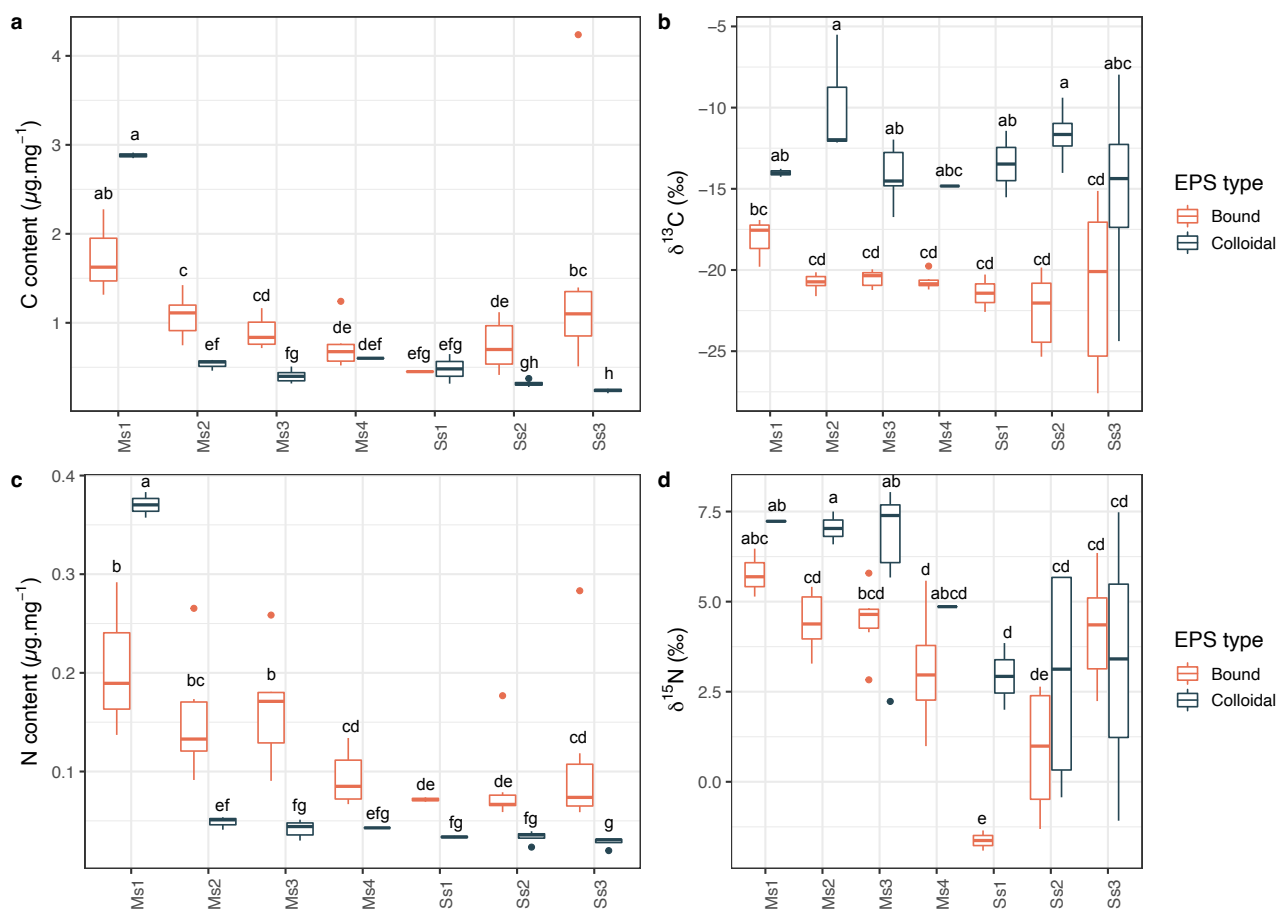

**Fig. 2.** Chemical composition of the EPS. **a,c:** Carbon (C) and Nitrogen (N) contents in  $\mu\text{g}$  per  $\text{mg}$  of freeze dried EPS. **b,d:** Carbon and Nitrogen stable isotope ratio ( $\delta$  notation against atmospheric  $N_2$  and Vienna PDB respectively) of the EPS. Colloidal EPS corresponded to loose, water-extractable exopolymers whereas bound EPS correspond to ion exchange resin-extractable exopolymers. Letters within the graph represent results of Fisher's least significant difference (LSD) post-hoc test. For the corresponding van der Waerden test, please see Table 1

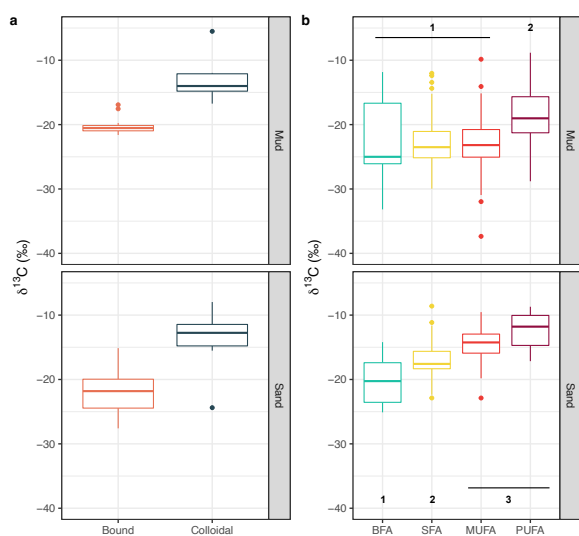

**Fig. 3.** Comparison of  $\delta^{13}\text{C}$  (corrected according to equation 1) between fatty acid classes and EPS fractions. **a:** bound and colloidal EPS were significantly different (t-tests,  $p < 0.001$ ) at both sites. **b:** numbers indicate significantly different groups as evidenced by post-hoc tests. BFA=branched, SFA=saturated, MUFA=monounsaturated and PUFA=polyunsaturated fatty acids

435 massive contribution of diatoms to bound EPS at the muddy  
436 site.

437 In a previous study, our team measured the monosaccharide  
438 compositions of sandy intertidal sediment EPS (14). As a  
439 result of the accumulation of silt in these sediments (caused  
440 by the implantation of biogenic structures), and the evolution  
441 of the diatom assemblage towards an epipelagic community,  
442 we observed a modification of the sugars produced, which  
443 only occurred in the bound fraction. This further confirms  
444 the large contribution of epipelagic diatoms to the bound EPS  
445 pool of muddy sediments.

446 In contrast, epipsammic diatoms mainly contributed to col-  
447 loidal extracellular polymers together with cyanobacteria,  
448 green algae and bacteria. Epipsammic diatoms do not mi-  
449 grate because they live in sediments which are very dynamic  
450 and which have a low light extinction coefficient over achiev-  
451 able distances of the order of hundreds of micrometers (48).  
452 As a result, these diatoms do not migrate but instead used  
453 adhesion to sand particle to avoid being resuspended. In the  
454 absence of photomigratory response, they much more rely  
455 on strong photophysiological protection mechanisms than  
456 epipelagic motile diatoms (48). Capsular and bound EPS were  
457 thus instead rather produced sparingly and used for attach-

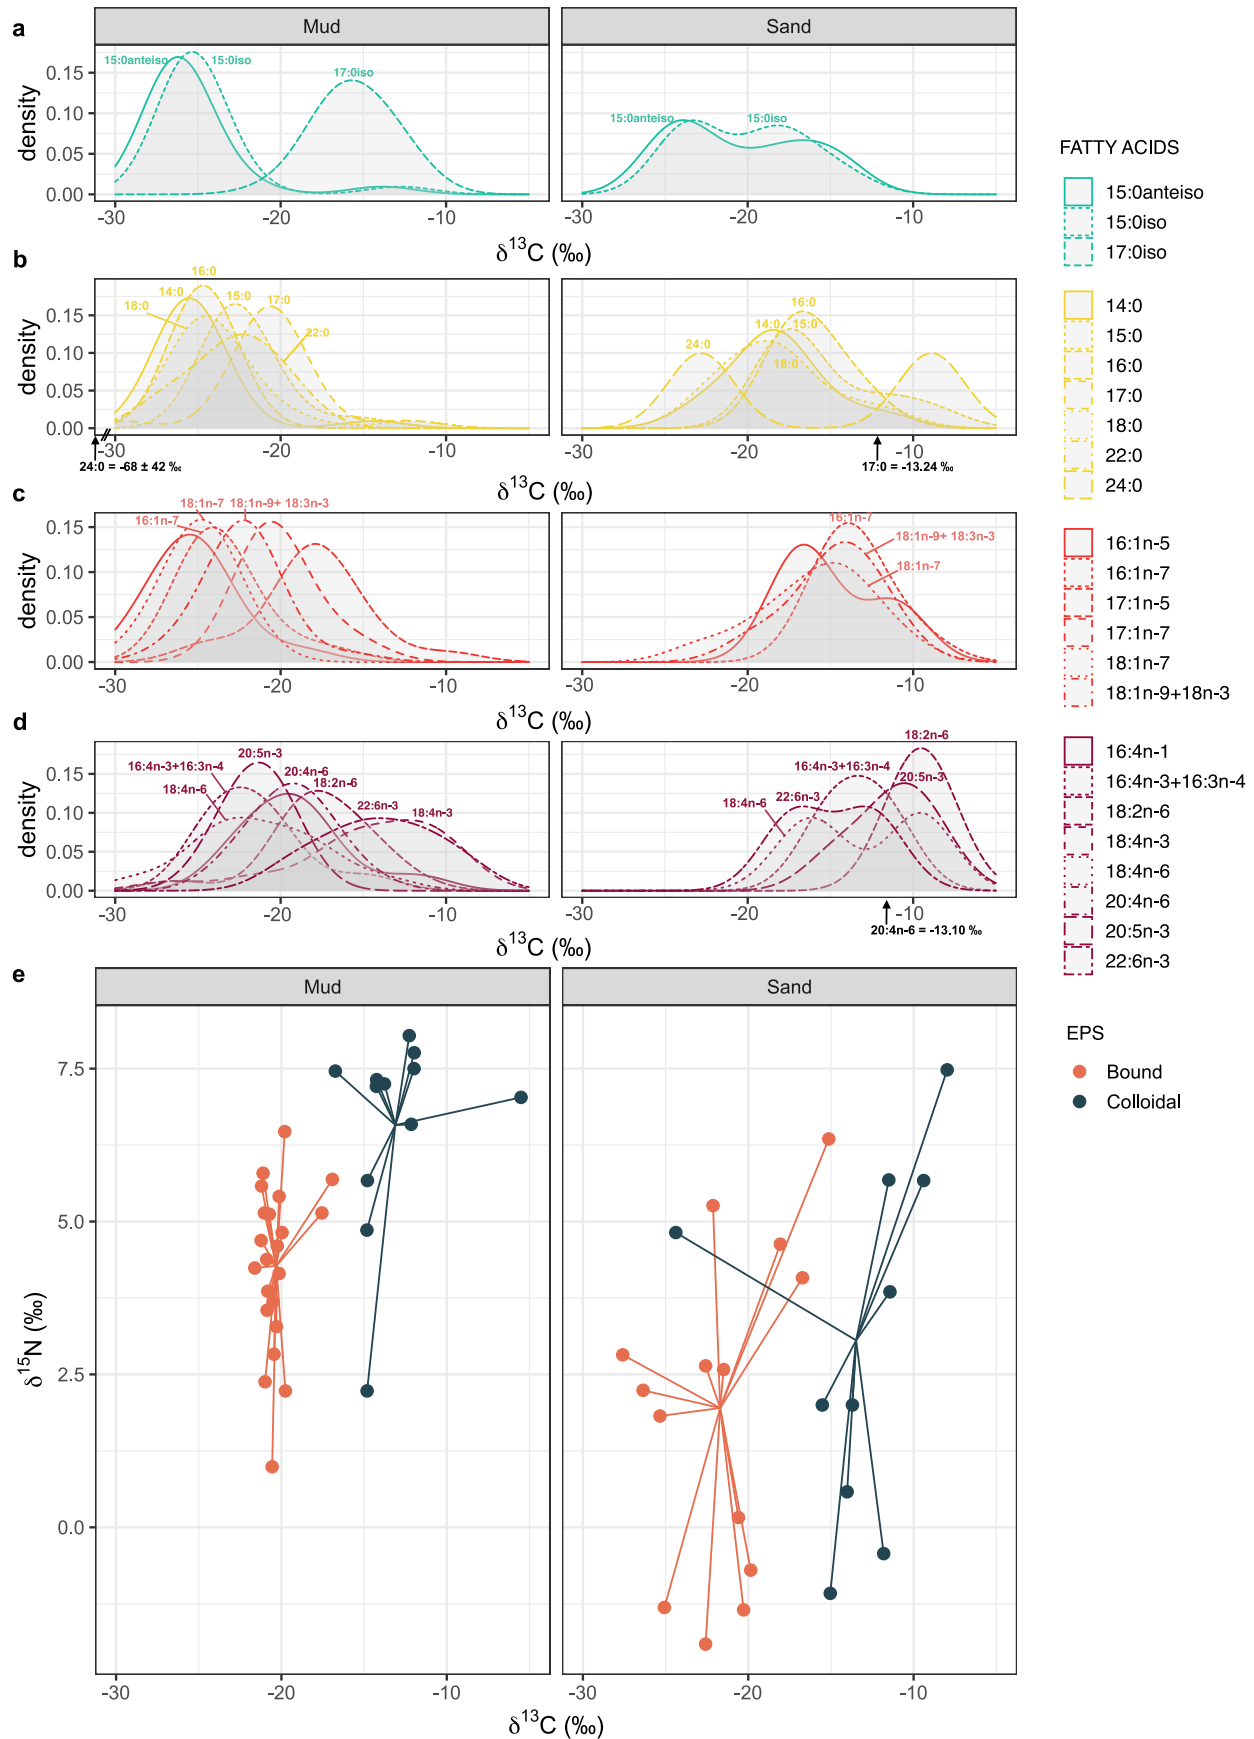

**Fig. 4.** C and N isotopic ratio of fatty acids and EPS fractions. **a-d**: Kernel density estimates of  $\delta^{13}\text{C}$  of fatty acid biomarkers (corrected according to equation 1). **e**:  $\delta^{13}\text{C}$  and  $\delta^{15}\text{N}$  biplots of bound and colloidal EPS. All sampling points were grouped together. In panels **a-d**, fatty acids are grouped by classes they belong to according to fig.3

458 ment and fixation purposes. 513  
459 In a benthic freshwater diatom, it has been shown that cap- 514  
460 sular EPS mainly consist of glycoprotein that develop from 515  
461 fibrillar precursors and that bacteria preferentially attach to 516  
462 encapsulated diatom cells (49). This is probably a strat- 517  
463 egy of the bacteria to maximise the chances of success in 518  
464 terms of adhesion and also to ensure access to an important 519  
465 food source. This may explain why bound EPS were mainly 520  
466 aligned with bacterial biomarkers at the this site. 521

467 **Multiple EPS origins favour the development of EP-** 522  
468 **S-specialised bacteria.** Since bound EPS best aligned with 523  
469 branched fatty acids, 18:1n-7 and some SFA at the sandy site 524  
470 (Table ST1), we could conclude that bound EPS were mainly 525  
471 of bacterial origin (3, 42, 50–53) at this site either as a direct 526  
472 production or as a result of degradation of bound and cap- 527  
473 sular diatomic EPS. Therefore, diatoms mainly contributed 528  
474 directly to the colloidal fraction which was also degraded by 529  
475 specialised bacteria (as shown by 18:1n-7). 530

476 It is very difficult and even impossible to assign a given 531  
477 branched fatty acid to a specific bacterial taxon. Certain 532  
478 fatty acids may represent a significant proportion of total 533  
479 fatty acids in certain bacterial groups or taxa. Vaccenic 534  
480 acid (18:1n-7), for example, can account for more than 30% 535  
481 of the total in purple bacteria (50). Similarly, 15:0iso and 536  
482 15:0anteiso fatty acids may be dominant in *Desulfovibrio* 537  
483 *sp.* species (53). But only a limited number of bacteria 538  
484 have unusual fatty acids. By contrast, branched-chain fatty 539  
485 acids of the iso and anteiso series occur widely in bacteria, 540  
486 give a complex pattern, and are therefore valuable in bac- 541  
487 terial systematics (54). In the present study, it is therefore 542  
488 the changes in the relative composition and/or dominance of 543  
489 bacterial fatty acids within the different EPS fractions that 544  
490 indicated changes in microbial assemblages, rather than the 545  
491 presence of any particular fatty acid. 546  
492 In addition, we also observed that branched fatty acids 547  
493 15:0anteiso and 15:0iso (Fig. 4a) showed a bimodal dis- 548  
494 tribution of their  $\delta^{13}\text{C}$  value at the sandy site. This can 549  
495 be explained by the fact that these fatty acids originated 550  
496 from different bacterial species with different C sources (i.e. 551  
497 bound vs. colloidal EPS) and further confirm the existence of 552  
498 prokaryotic assemblages dedicated to each EPS fractions. 553  
499 Earlier  $^{13}\text{C}$  enrichment experiments have already shown EPS 554  
500 consumption by bacteria through 15:0anteiso and 15:0iso en- 555  
501 richment but also provided additional evidence that some 556  
502 taxa (e.g. *Acinetobacter*) might be considered specialist EPS- 557  
503 degrading bacteria (42). 558

504 Similarly, the presence of "EPS degraders" can also be 559  
505 demonstrated at the muddy site. At this site, colloidal EPS 560  
506 aligned well with 17:0iso indicating that specific taxa rich 561  
507 in this branched fatty acid are predominantly involved in the 562  
508 production of colloidal EPS, probably from the degradation 563  
509 of diatom bound EPS. 564  
565  
566  
567  
568  
569  
570  
571  
572  
573  
574  
575  
576  
577  
578  
579  
580

## 510 Conclusions

511 By comparing the natural C and N stable isotope ratios of 581  
512 fatty acids and bound and colloidal EPS fractions in inter- 582  
583

tidal sediments, we identified a very different dynamics of  
EPS production and degradation between sandy and muddy  
sites. The most noticeable difference was that epipellic and  
episammic diatoms contributed differently to the chemistry  
of the EPS, which had an important implication for the de-  
velopment of EPS specialised bacteria. These differences are  
thought to be related to differences in the functioning of the  
epipellic and epipsammic communities and in particular to the  
use of EPS either for motility or for cell attachment purposes.

## CONFLICT OF INTEREST DISCLOSURE

The authors declare that they have no financial conflicts of interest in relation to the content of the article.

## AUTHOR CONTRIBUTIONS

Conceptualization: KS, BJ, CH ; Data Curation: CH ; Formal analysis: CH ; Fund-  
ing acquisition: KS, BJ, CH ; Investigation: all authors ; Methodology: all authors ;  
Project administration: KS, BJ, CH ; Resources: all authors ; Software: CH ; Super-  
vision: KS ; Validation: all authors ; Visualization: CH ; Writing – original draft: CH ;  
Writing – review & editing: CH, BJ, VM, KS.

## ACKNOWLEDGEMENTS

Some data were acquired on research platforms, which we would like to thank.  
CSIA data were acquired at Stable Isotope Platform of the European Institute for  
Marine Studies (IUEM, Brest, France). EA-IRMS data were acquired at the UC  
Davis stable isotope facility.

## FUNDING

This study was supported by the BIO-Tide project (The role of microbial biodiversity  
in the functioning of marine tidal flat sediments), funded through the 2015–2016  
BiodivERSA COFUND call for research proposals, with the national funders BelSPO  
(BRAIN-be contract BR/175/A1/BIO-Tide-BE), FWO (3G0H6816), ANR (ANR-16-  
EBI3-0008), and SNSF. The post-doctoral grant of J. G-B was supported by the  
Regional Council of Brittany, SAD program and META-Tide projects.

## Bibliography

1. T J Tolhurst, B Jesus, V Brotas, and D M Paterson. Diatom migration and sediment armouring - An example from the Tagus Estuary, Portugal. In *Hydrobiologia*, volume 503, pages 183–193. Springer, August 2003. doi: 10.1023/B:HYDR.0000008474.33782.8d. ISSN: 00188158 Issue: 1.
2. H V Lubarsky, C Hubas, M Chocholek, F Larson, W Manz, D M Paterson, and S U Gersbersdorf. The Stabilisation Potential of Individual and Mixed Assemblages of Natural Bacteria and Microalgae. *PLoS ONE*, 5(11):e13794, January 2010. ISSN 19326203. doi: 10.1371/journal.pone.0013794.
3. Jack J Middelburg, Christiane Barranguet, Henricus T S Boschker, Peter M J Herman, Tom Moens, and Carlo H R Heip. The fate of intertidal microphytobenthos carbon: An in situ  $^{13}\text{C}$ -labeling study. *Limnology and Oceanography*, 45(6):1224–1234, 2000. ISSN 00243590. doi: 10.4319/lo.2000.45.6.1224. ISBN: 0024-3590.
4. B J Bellinger, Graham J C Underwood, S E Ziegler, and Michael R Gretz. Significance of diatom-derived polymers in carbon flow dynamics within estuarine biofilms determined through isotopic enrichment. *Aquatic Microbial Ecology*, 55(2):169–187, 2009. doi: 10.3354/ame01287.
5. C Passarelli, F Olivier, D M M Paterson, T Meziane, and C Hubas. Organisms as cooperative ecosystem engineers in intertidal flats. *Journal of Sea Research*, 92, 2014. ISSN 13851101. doi: 10.1016/j.seares.2013.07.010.
6. J W Costerton, J Lewandowski, D De Beer, D Caldwell, D Korber, and G James. Biofilms, the Customized Microniche. *Journal of Bacteriology*, 176(8):2137–2142, 1994. doi: 10.1128/jb.176.8.2137-2142.1994.
7. A W Decho. Microbial biofilms in intertidal systems : an overview. *Continental Shelf Research*, 20(10-11):1257–1273, 2000. doi: 10.1016/S0278-4343(00)00022-4.
8. Graham J C Underwood and David M Paterson. The importance of extracellular carbohydrate production by marine epipellic diatoms. 40:183–240, 2003. doi: 10.1016/S0065-2296(05)40005-1. ISSN: 0065-2296.
9. Paola Cesutti. Bacterial Capsular Polysaccharides and Exopolysaccharides. In *Microbial Glycobiology*, pages 93–108. Elsevier Inc., January 2010. ISBN 978-0-12-374546-0.
10. R S Wotton. The essential role of exopolymers (EPS) in aquatic systems. *Oceanography and Marine Biology: an Annual Review*, 42:57–94, 2004. doi: 10.1201/9780203507810.
11. Eri Takahashi, Jérôme Ledauphin, Didier Goux, and Francis Orvain. Optimising extraction of extracellular polymeric substances (EPS) from benthic diatoms: comparison of the efficiency of six EPS extraction methods. *Marine and Freshwater Research*, 60(12):11(textbackslashtextendash)10, 2009. ISSN 1323-1650. doi: 10.1071/MF08258. Publisher: CSIRO publishing.
12. B J Bellinger, A S Abdullahi, M R Gretz, and G J C Underwood. Biofilm polymers: relationship between carbohydrate biopolymers from estuarine mudflats and unialgal cultures of benthic diatoms. *Aquatic Microbial Ecology*, 38(2):169–180, February 2005. ISSN 0948-3055. doi: 10.3354/ame038169. Publisher: Inter-Research.



- 584 13. A R M Hanlon, B Bellinger, K Haynes, G Xiao, T A Hofmann, M R Gretz, A S Ball, A M 670  
585 Osborn, and G J C Underwood. Dynamics of extracellular polymeric substance (EPS) 671  
586 production and loss in an estuarine, diatom-dominated, microalgal biofilm over a tidal 672  
587 emersion-immersion period. *Limnology and Oceanography*, 51(1):79–93, January 2006. 673  
588 ISSN 00243590. doi: 10.4319/lo.2006.51.1.0079. 674
- 589 14. C Passarelli, T Meziane, N Thiney, D Boeuf, B Jesus, M Ruivo, C Jeanthon, and C Hubas. 675  
590 Seasonal variations of the composition of microbial biofilms in sandy tidal flats: Focus of 676  
591 fatty acids, pigments and exopolymers. *Estuarine, Coastal and Shelf Science*, 153(0):29–677  
592 37, 2015. ISSN 02727714. doi: 10.1016/j.ecss.2014.11.013. 678
- 593 15. K Haynes, T A Hofmann, C J Smith, A S Ball, G J C Underwood, and A M Osborn. Diatom- 679  
594 derived carbohydrates as factors affecting bacterial community composition in estuarine 680  
595 sediments. *Applied and Environmental Microbiology*, 73(19):6112–6124, October 2007. 681  
596 ISSN 0099-2240. doi: 10.1128/AEM.00551-07. 682
- 597 16. Julio Bohórquez, Terry J McGenity, Sokratis Papaspyrou, Emilio García-Robledo, Alfonso 683  
598 Corzo, and Graham J C Underwood. Different types of diatom-derived extracellular poly- 684  
599 meric substances drive changes in heterotrophic bacterial communities from intertidal sed- 685  
600 iments. *Frontiers in Microbiology*, 8(FEB):245, February 2017. ISSN 1664302X. doi: 686  
601 10.3389/fmicb.2017.00245. Publisher: Frontiers Research Foundation. 687
- 602 17. Steven S Branda, Shild Vik, Lisa Friedman, and Roberto Kolter. Biofilms: the matrix 688  
603 revisited. *Trends in microbiology*, 13(1):20–26, January 2005. ISSN 0966-842X. doi: 689  
604 10.1016/j.tim.2004.11.006. 690
- 605 18. Cristina Solano, Maite Echeverz, and Iñigo Lasa. Biofilm dispersion 691  
606 and quorum sensing. *Current Opinion in Microbiology*, 18(1):96–104, 692  
607 2014. ISSN 13695274. doi: 10.1016/j.mib.2014.02.008. ISBN: 1879-0364 693  
608 (Electronic)\$. doi: 10.1016/j.mib.2014.02.008. ISBN: 1879-0364 693  
609 (Electronic)\$. doi: 10.1016/j.mib.2014.02.008. ISBN: 1879-0364 693
- 610 19. A Camilli and Bonnie L Bassler. Bacterial Small-Molecule Signaling Pathways. *Science*, 695  
611 311(5764):1113–1116, 2006. ISSN 0036-8075. doi: 10.1126/science.1121357. 696
- 612 20. Alan W Decho, Pieter T Visscher, John Ferry, Tomohiro Kawaguchi, Lijian He, Kristen M 697  
613 Przekop, R Sean Norman, and R Pamela Reid. Autoinducers extracted from microbial mats 698  
614 reveal a surprising diversity of N-acylhomoserine lactones (AHLs) and abundance changes 699  
615 that may relate to diel pH. *Environmental microbiology*, 11(2):409–420, 2009. ISSN 1462- 700  
616 2920. doi: 10.1111/j.1462-2920.2008.01780.x. 701
- 617 21. Alan W Decho. Overview of biopolymer-induced mineralization: What goes on in biofilms? 702  
618 *Ecological Engineering*, 36(2):137–144, 2010. ISSN 09258574. doi: 10.1016/j.ecoleng.2009. 703  
619 01.003. Publisher: Elsevier B.V. 704
- 620 22. Bart Veuger, Dick van Oevelen, and Jack J Middelburg. Fate of microbial nitrogen, carbon, 705  
621 hydrolysable amino acids, monosaccharides, and fatty acids in sediment. *Geochimica et 706*  
622 *Cosmochimica Acta*, 83:217–233, April 2012. ISSN 00167037. doi: 10.1016/j.gca.2011.12. 707  
623 016. Publisher: Pergamon. 708
- 624 23. Joanne M Oakes, Bradley D Eyre, Jack J Middelburg, and Henricus T S Boschker. 709  
625 Composition, production, and loss of carbohydrates in subtropical shallow subtidal sandy 710  
626 sediments: Rapid processing and long-term retention revealed by <sup>13</sup>C-labeling. *Lim- 711*  
627 *nology and Oceanography*, 55(5):2126–2138, September 2010. ISSN 1939-5590. doi: 712  
628 10.4319/lo.2010.55.5.2126. Publisher: John Wiley & Sons, Ltd. 713
- 629 24. Carla C R C R De Carvalho and Maria José Caramujo. Fatty acids as a tool to under- 714  
630 stand microbial diversity and their role in food webs of mediterranean temporary ponds. 715  
631 *Molecules*, 19(5):5570–5598, 2014. ISSN 14203049. doi: 10.3390/molecules19055570. 716  
632 ISBN: 1420-3049 Publisher: Molecular Diversity Preservation International. 717
- 633 25. Nicole A. Dijkman, Henricus T S Boschker, Lucas J Stal, and Jacco C Kromkamp. Compo- 718  
634 sition and heterogeneity of the microbial community in a coastal microbial mat as revealed 719  
635 by the analysis of pigments and phospholipid-derived fatty acids. *Journal of Sea Research*, 720  
636 63(1):62–70, January 2010. ISSN 13851101. doi: 10.1016/j.seares.2009.10.002. Publisher: 721  
637 Elsevier B.V. 722
- 638 26. R H Findlay, G M King, and L Watling. Efficacy of phospholipid analysis in determining 723  
639 microbial biomass in sediments. *Applied and Environmental Microbiology*, 55(11):2888– 724  
640 2893, 1989. ISSN 00992240. doi: 10.1128/aem.55.11.2888-2893.1989. Publisher: American 725  
641 Society for Microbiology (ASM). 726
- 642 27. C Hubas, D Boeuf, B Jesus, N Thiney, Y Bozec, and C Jeanthon. A nanoscale study 727  
643 of carbon and nitrogen fluxes in mats of purple sulfur bacteria: Implications for carbon 728  
644 cycling at the surface of coastal sediments. *Frontiers in Microbiology*, 8(OCT), 2017. ISSN 729  
645 1664302X. doi: 10.3389/fmicb.2017.01995. 730
- 646 28. Julie Gaubert-Boussarie, Soizic Prado, and Cédric Hubas. An untargeted metabolomic 731  
647 approach for microphytobenthic biofilms in intertidal mudflats. *Frontiers in Marine Science*, 732  
648 7:250, 2020. ISSN 2296-7745. doi: 10.3389/fmars.2020.00250. Publisher: Frontiers. 733
- 649 29. Anthony Le Bris, Philippe Rosa, Astrid Lerouxel, Bruno Cogne, Pierre Gernez, Patrick 734  
650 Launeau, Marc Robin, and Laurent Barillé. Hyperspectral remote sensing of wild oyster 735  
651 reefs. *Estuarine, Coastal and Shelf Science*, 172:1–12, April 2016. ISSN 0272-7714. doi: 736  
652 10.1016/j.ecss.2016.01.039. Publisher: Academic Press. 737
- 653 30. Jean Philippe Combe, Patrick Launeau, Véronique Carrère, Daniela Despan, Vona Méléder, 738  
654 Laurent Barillé, and Christophe Sotin. Mapping microphytobenthos biomass by non-linear 739  
655 inversion of visible-infrared hyperspectral images. *Remote Sensing of Environment*, 98(4): 740  
656 371–387, October 2005. ISSN 0034-4257. doi: 10.1016/j.rse.2005.07.010. Publisher: 741  
657 Elsevier. 742
- 658 31. Farzaneh Kazempour, Patrick Launeau, and Vona Méléder. Microphytobenthos biomass 743  
659 mapping using the optical model of diatom biofilms: Application to hyperspectral images 744  
660 of Bourgneuf Bay. *Remote Sensing of Environment*, 127:1–13, December 2012. ISSN 745  
661 0034-4257. doi: 10.1016/j.rse.2012.08.016. Publisher: Elsevier. 746
- 662 32. V Méléder, L Barillé, Y Rincé, M Morange, P Rosa, and P Gaudin. Spatio-temporal 747  
663 changes in microphytobenthos structure analysed by pigment composition in a macro- 748  
664 tidal flat (Bourgneuf Bay, France). *Marine Ecology Progress Series*, 297:83–99, 2005. ISSN 749  
665 0171-8630. doi: 10.3354/meps297083. 750
- 666 33. Vona Méléder, Yves Rincé, Laurent Barillé, Pierre Gaudin, and Philippe Rosa. Spatiotem- 751  
667 poral changes in microphytobenthos assemblages in a macrotidal flat (Bourgneuf Bay, 752  
668 France). *Journal of Phycology*, 43(6):1177–1190, December 2007. ISSN 00223646. doi: 753  
669 10.1111/j.1529-8817.2007.00423.x. 754
- 670 34. M Dubois, K A Gilles, J K Hamilton, P A Rebers, and F Smith. Colorimetric Method for 755  
671 Determination of Sugars and Related Substances. *Analytical Chemistry*, 28(3):350–356,  
672 1956. doi: 10.1021/ac60111a017.
- 673 35. Oliver H. Lowry, Niraj. Rosebrough, A Lewis Farr, and Rose J. Randall. Protein measurement  
674 with the folin phenol reagent. *Journal of Biological Chemistry*, 193(1):265–275, November  
675 1951. ISSN 00219258. doi: 10.1016/S0021-9258(19)52451-6.
- 676 36. E G Bligh and W J Dyer. A Rapid Method of Total Lipid Extraction and Purification. *Canadian  
677 Journal of Biochemistry and Physiology*, 37(8):911–917, 1959. ISSN 0576-5544. doi: 10.  
678 1139/059-099.
- 679 37. T Meziane and M Tsuchiya. Fatty acids as tracers of organic matter in the sediment and food  
680 web of a mangrove/intertidal flat ecosystem, Okinawa, Japan. *Marine Ecology Progress  
681 Series*, 200:49–57, 2000. doi: 10.3354/meps200049.
- 682 38. Michail I Gladyshev, Nadezhda N Sushchik, Galina S Kalachova, and Olesia N Makhutova.  
683 Stable isotope composition of fatty acids in organisms of different trophic levels in the Yenisei  
684 River. *PLoS one*, 7(3):e34059, January 2012. ISSN 1932-6203. doi: 10.1371/journal.pone.  
685 0034059.
- 686 39. Roger E Summons, Linda L Jahnke, and Zarko Roksandic. Carbon isotopic fractionation in  
687 lipids from methanotrophic bacteria: Relevance for interpretation of the geochemical record  
688 of biomarkers. *Geochimica et Cosmochimica Acta*, 58(13):2853–2863, July 1994. ISSN  
689 00167037. doi: 10.1016/0016-7037(94)90119-8. Publisher: Pergamon.
- 690 40. N Blair, A Leu, E Muñoz, J Olsen, E Kwong, D Des Marais, E Munoz, J Olsen, E Kwong,  
691 and D Des Marais. Carbon isotopic fractionation in heterotrophic microbial metabolism.  
692 *Applied and Environmental Microbiology*, 50(4):996–1001, October 1985. ISSN 00992240.  
693 doi: 10.1128/aem.50.4.996-1001.1985. Publisher: American Society for Microbiology (ASM).
- 694 41. A W Decho and D J W Moriarty. Bacterial exopolymer utilization by a harpacticoid copepod:  
695 a methodology and results. *Limnology and Oceanography*, 35(5):1039–1049, 1990. doi:  
696 10.4319/lo.1990.35.5.1039.
- 697 42. Joe D Taylor, Boyd A Mckew, Alison Kuhl, Terry J Mcgenity, and Graham J C Underwood.  
698 Microphytobenthic extracellular polymeric substances (EPS) in intertidal sediments fuel  
699 both generalist and specialist EPS-degrading bacteria. *Limnology and Oceanography*, 58  
700 (4):1463–1480, 2013. doi: 10.4319/lo.2013.58.4.1463.
- 701 43. Blair G Paul, Haibing Ding, Sarah C Bagby, Matthias Y Kellermann, Molly C Redmond,  
702 Gary L Andersen, and David L Valentine. Methane-oxidizing bacteria shunt carbon to mi-  
703 crobrial mats at a marine hydrocarbon seep. *Frontiers in Microbiology*, 8(FEB):186, February  
704 2017. ISSN 1664302X. doi: 10.3389/FMICB.2017.00186/BIBTEX. Publisher: Frontiers Re-  
705 search Foundation.
- 706 44. Christiane Uhlig, John B Kirkpatrick, Steven D'Hondt, and Brice Loose. Methane-oxidizing  
707 seawater microbial communities from an Arctic shelf. *Biogeosciences*, 15(11):3311–3329,  
708 June 2018. ISSN 17264189. doi: 10.5194/bg-15-3311-2018. Publisher: Copernicus  
709 GmbH.
- 710 45. Zhiqian Yi, Maonian Xu, Xiaxia Di, Sigurdur Brynjolfsson, and Weiqi Fu. Exploring valuable  
711 lipids in diatoms. 4(17), January 2017. doi: 10.3389/fmars.2017.00017. ISSN: 22967745  
712 Issue: JAN Pages: 17 Publication Title: Frontiers in Marine Science Volume: 4 DOI:  
713 10.3389/fmars.2017.00017
- 714 46. Graeme A Dunstan, John K Volkman, Stephanie M Barrett, Jeannie-marie Leroi, and S W  
715 Jeffrey. Essential Polyunsaturated Fatty Acids from 14 Species of Diatoms (Bacillariophy-  
716 cae). *Phytochemistry*, 35(1):155–161, 1994. doi: 10.1016/S0031-9422(00)90525-9.
- 717 47. Paulo Cartaxana, Vanda Brotas, and João Serôdio. Effects of two motility inhibitors on the  
718 photosynthetic activity of the diatoms *Cylindrocapsa closterium* and *Pleurosira angulatum*.  
719 <http://dx.doi.org/10.1080/0269249X.2008.9705737>, 23(1):65–74, 2011. ISSN 21598347.  
720 doi: 10.1080/0269249X.2008.9705737. Publisher: Taylor & Francis Group.
- 721 48. P Cartaxana, M Ruivo, C Hubas, I Davidson, J Serôdio, and B Jesus. Physiological versus  
722 behavioral photoprotection in intertidal epipelagic and epipsammic benthic diatom commu-  
723 nities. *Journal of Experimental Marine Biology and Ecology*, 405(1-2):120–127, 2011. ISSN  
724 00220981. doi: 10.1016/j.jembe.2011.05.027.
- 725 49. Katrin Leinweber and Peter G Kroth. Capsules of the diatom *Achnanthes minutissimum*  
726 arise from fibrillar precursors and foster attachment of bacteria. *PeerJ*, 3:e858, January  
727 2015. ISSN 2167-8359. doi: 10.7717/peerj.858.
- 728 50. V I Khariamenko, N V Zhukova, S V Khotimchenko, V I Svetashev, and G M Kamenev. Fatty  
729 acids as markers of food sources in a shallow-water hydrothermal ecosystem (Kraternaya  
730 Aight, Yankich Island, Kurile Islands). *Marine Ecology-Progress Series*, 120:231–241, 1995.  
731 doi: 10.3354/meps120231.
- 732 51. G J Perry, J K Volkman, R B Johns, and H J Bavor. Fatty acids of bacterial origin in contem-  
733 porary marine sediments. *Geochimica et Cosmochimica Acta*, 43(11):1715–1725, Novem-  
734 ber 1979. ISSN 00167037. doi: 10.1016/0016-7037(79)90020-6. Publisher: Pergamon.
- 735 52. C Hubas, B Jesus, M Ruivo, T Meziane, N Thiney, D Davout, N Spilmont, D M M Paterson,  
736 and C Jeanthon. Proliferation of purple sulphur bacteria at the sediment surface affects  
737 intertidal mat diversity and functionality. *PLoS ONE*, 8(12), 2013. ISSN 19326203. doi:  
738 10.1371/journal.pone.0082329.
- 739 53. Jaap J Boon, J W De Leeuw, G J v.D. Hoek, H J Vosjan, J W de Leeuw, G J v. d. Hoek, and  
740 J H Vosjan. Significance and taxonomic value of iso and anteiso monoenoic fatty acids and  
741 branched beta-hydroxy acids in *Desulfovibrio desulfuricans*. *Journal of Bacteriology*, 129(3):  
742 1183–1191, 1977. doi: 10.1128/jb.129.3.1183-1191.1977.
- 743 54. Toshi Kaneda. Iso- and Anteiso-Fatty Acids in Bacteria: Biosynthesis, Function, and  
744 Taxonomic Significance. *Microbiological Reviews*, 55(2):288–302, 1991. doi: 10.1128/mr.  
745 55.2.288-302.1991.
- 746 55. Sigrún Huld Jónasdóttir. Fatty acid profiles and production in marine phytoplankton. 17  
747 (3):151, March 2019. doi: 10.3390/md17030151. ISSN: 16603397 Issue: 3 Pages: 151  
748 Publication Title: Marine Drugs Volume: 17.
- 749 56. Bhaba Kumar Pegu, Devid Kardong, Pankaj Chetia, Jitu Chutia, and Dip Kumar Gogoi.  
750 Isolation and characterization of a  $\alpha$ -l-rhamnosidase producing bacterium, *Agrococcus* sp.  
751 bkd37, from a warehouse soil and partial optimization of its culture conditions. *Applied  
752 Biological Research*, 22(3):203–214, 2020. ISSN 0972-0979. doi: 10.5958/0974-4517.2020.  
753 00028.2. Publisher: Diva Enterprises Private Limited.
- 754 57. R Guerrero, M Piqueras, and M Berlanga. Microbial mats and the search for minimal  
755 ecosystems. *International microbiology: the official journal of the Spanish Society for Mi-  
756 crobiology*, 5(4):177–188, 2002. ISSN 1139-6709. doi: 10.1007/s10123-002-0094-8.
- 757 58. Eva Leu, Stig Falk-Petersen, and Dag O Hessen. Ultraviolet radiation negatively affects

- 756 growth but not food quality of arctic diatoms. *Limnology and Oceanography*, 52(2):787–  
757 797, March 2007. ISSN 00243590. doi: 10.4319/llo.2007.52.2.0787. Publisher: American  
758 Society of Limnology and Oceanography Inc.
- 759 59. Abhishek Sahu, Imran Pancha, Deepti Jain, Chetan Paliwal, Tonmoy Ghosh, Shailesh Pati-  
760 dar, Sourish Bhattacharya, and Sandhya Mishra. Fatty acids as biomarkers of microalgae.  
761 *Phytochemistry*, 89:53–58, May 2013. ISSN 00319422. doi: 10.1016/j.phytochem.2013.02.  
762 001. Publisher: Pergamon.
- 763 60. Mikhail Vyssotski, Kirill Lagutin, Andrew MacKenzie, and Yutaka Itabashi. Chemical syn-  
764 thesis and gas chromatographic behaviour of  $\gamma$ -stearidonic (18:4n-6) acid. *JAOCs, Journal*  
765 *of the American Oil Chemists' Society*, 92(3):383–391, March 2015. ISSN 0003021X. doi:  
766 10.1007/s11746-014-2588-x. Publisher: Springer Verlag.
- 767 61. Marine Vallet, Tarik Meziane, Najet Thiney, Soizic Prado, and Cedric Hubas. Laminariales  
768 host does impact lipid temperature trajectories of the fungal endophyte paradendryphiella  
769 salina (Sutherland.). *Marine Drugs*, 18(8):379, July 2020. ISSN 16603397. doi: 10.3390/  
770 MD18080379. Publisher: MDPI AG.
- 771 62. Marine Remize, Frédéric Planchon, Ai Ning Loh, Fabienne Le Grand, Antoine Bideau, Nelly  
772 Le Goic, Elodie Fleury, Philippe Miner, Rudolph Corvaisier, Aswani Volety, and Philippe  
773 Soudant. Study of synthesis pathways of the essential polyunsaturated fatty acid 20:5n-3 in  
774 the diatom chaetoceros muelleri using  $^{13}$ C-isotope labeling. *Biomolecules*, 10(5):797, May  
775 2020. ISSN 2218273X. doi: 10.3390/biom10050797. Publisher: MDPI AG.
- 776 63. Marine Vallet, Martina Strittmatter, Pedro Murúa, Sandrine Lacoste, Joëlle Dupont, Cedric  
777 Hubas, Gregory Genta-Jouve, Claire M M Gachon, Gwang Hoon Kim, and Soizic Prado.  
778 Chemically-Mediated Interactions Between Macroalgae, Their Fungal Endophytes, and Pro-  
779 tistan Pathogens. *Frontiers in Microbiology*, 9, December 2018. ISSN 1664-302X. doi:  
780 10.3389/fmicb.2018.03161. Publisher: Frontiers Media SA.

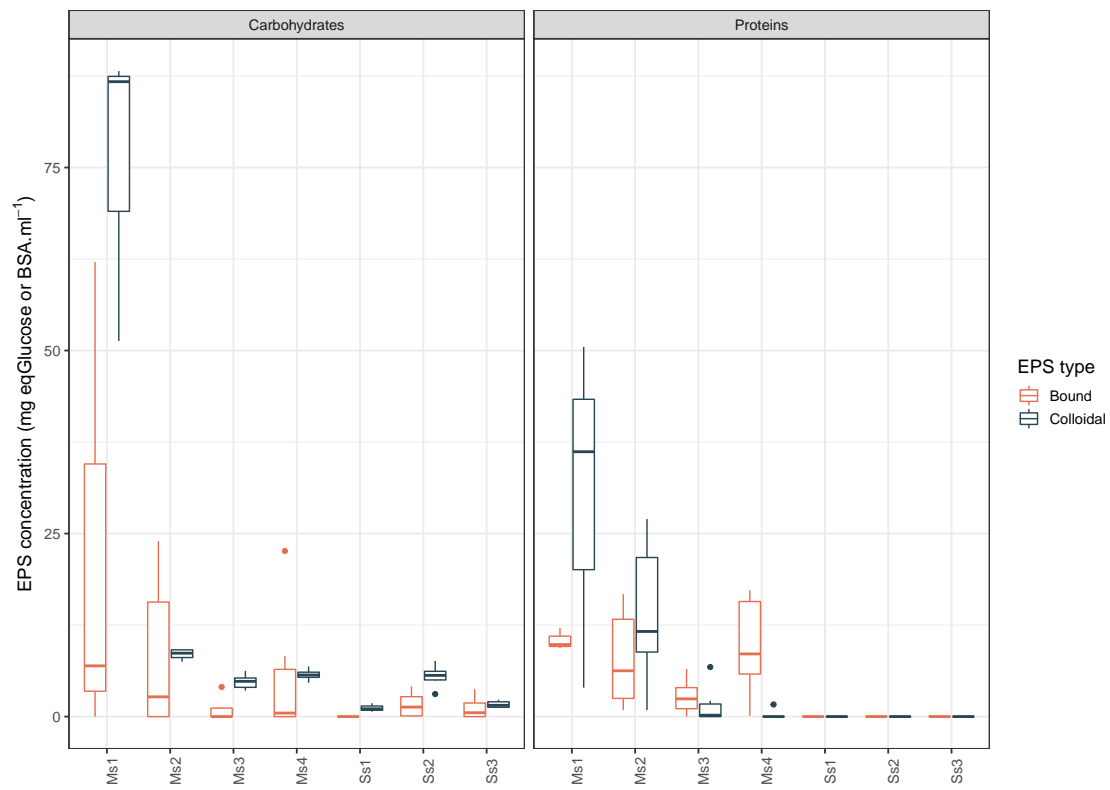

**Fig. SF1.** Colorimetric measurements of EPS concentrations in mg equivalent to Glucose or Bovine Serum Albumine (BSA) for carbohydrates and proteins respectively per mL of extracted EPS; colloidal EPS corresponded to loose, water-extractable exopolymers whereas bound EPS correspond to ion exchange resin-extractable exopolymers.

**Table ST1.** Presumed sources of colloidal and bound EPS (carbohydrates, proteins) at muddy and sandy sites. Position refers to the quality of alignment between fatty acids and EPS  $\delta^{13}\text{C}$  values: Aligned = the mean  $\delta^{13}\text{C}$  value of a given fatty acid was within the standard deviation or confidence interval of the corresponding EPS isotope ratio, Sup. (Superimposed) =  $\delta^{13}\text{C}$  values of EPS and fatty acids overlapped by their standard deviations or confidence intervals. **Bold underlined** = major fatty acid (20-40%) in the corresponding sources. **Bold** = important fatty acid (10-20%), *Italic* = present in trace amounts (<10%)

| Location | EPS type  | Fatty acids          | Position | Possible origin of FA                                                                                                                                                                                                                                                                                                                                                                                                                                                                                                                                                                                                                                                                      |
|----------|-----------|----------------------|----------|--------------------------------------------------------------------------------------------------------------------------------------------------------------------------------------------------------------------------------------------------------------------------------------------------------------------------------------------------------------------------------------------------------------------------------------------------------------------------------------------------------------------------------------------------------------------------------------------------------------------------------------------------------------------------------------------|
|          | Colloidal | 22:6n-3              | Aligned  | <b>Dinoflagellates, Haptophyta (55), Diatoms, Cyanobacteria (25, 46, 55)</b><br><i>Bacteria (51, 56)</i>                                                                                                                                                                                                                                                                                                                                                                                                                                                                                                                                                                                   |
|          |           | 20:0                 |          |                                                                                                                                                                                                                                                                                                                                                                                                                                                                                                                                                                                                                                                                                            |
|          |           | 18:4n-3              | Sup.     | <b>Haptophyta, Pheophyceae (57), Diatoms (46)</b><br><b>Bacteria (51, 54)</b>                                                                                                                                                                                                                                                                                                                                                                                                                                                                                                                                                                                                              |
|          |           | 17:0iso              |          |                                                                                                                                                                                                                                                                                                                                                                                                                                                                                                                                                                                                                                                                                            |
| Mud      |           | 20:4n-6              | Aligned  | <i>Diatoms (25, 46, 55), Chlorophyta (? )</i><br><i>Bacteria (56)</i><br><b>Diatoms (58), Diatoms (46, 55)</b>                                                                                                                                                                                                                                                                                                                                                                                                                                                                                                                                                                             |
|          |           | 17:1n-5/7            |          |                                                                                                                                                                                                                                                                                                                                                                                                                                                                                                                                                                                                                                                                                            |
|          | Bound     | 22:0                 | Sup.     | <i>Diatoms (58), Cyanobacteria (59)</i><br><b>Diatoms (25, 46, 58), Diatoms (55)</b><br><i>Cyanobacteria (60)</i><br><b>Cyanobacteria, Chlorophyta (55, 59), Fungi (61)</b><br><b>Cyanobacteria, Chlorophyta (55, 59) / (25, 55) *</b><br><i>Bacteria, Diatoms (51, 58)</i><br><b>Bacteria (51, 54)</b><br><i>Diatoms (55, 62) / Chlorophyta (55)</i><br><b>Bacteria (56), Diatoms, Chlorophyta (25, 46, 59)</b>                                                                                                                                                                                                                                                                           |
|          |           | 20:5n-3              |          |                                                                                                                                                                                                                                                                                                                                                                                                                                                                                                                                                                                                                                                                                            |
|          |           | 18:4n-6              |          |                                                                                                                                                                                                                                                                                                                                                                                                                                                                                                                                                                                                                                                                                            |
|          |           | 18:2n-6              |          |                                                                                                                                                                                                                                                                                                                                                                                                                                                                                                                                                                                                                                                                                            |
|          |           | 18:1n-9/18:3n-3      |          |                                                                                                                                                                                                                                                                                                                                                                                                                                                                                                                                                                                                                                                                                            |
|          |           | 17:0                 |          |                                                                                                                                                                                                                                                                                                                                                                                                                                                                                                                                                                                                                                                                                            |
|          |           | 17:iso               |          |                                                                                                                                                                                                                                                                                                                                                                                                                                                                                                                                                                                                                                                                                            |
|          |           | 16:3n-4/16:4n-3      |          |                                                                                                                                                                                                                                                                                                                                                                                                                                                                                                                                                                                                                                                                                            |
|          |           | 15:0                 |          |                                                                                                                                                                                                                                                                                                                                                                                                                                                                                                                                                                                                                                                                                            |
|          |           |                      |          |                                                                                                                                                                                                                                                                                                                                                                                                                                                                                                                                                                                                                                                                                            |
|          | Colloidal | 22:6n-3              | Aligned  | <b>Dinoflagellates, Haptophyta (55), Diatoms, Cyanobacteria (25, 46, 55)</b><br><b>Diatoms (58)</b><br><i>Diatoms (25, 46, 55), Chlorophyta (55)</i><br><i>Cyanobacteria (60)</i><br><b>Cyanobacteria, Chlorophyta (55, 59)</b><br><b>Cyanobacteria, Chlorophyta (55, 59) / (25, 55) *</b><br><i>Bacteria (3)</i><br><i>Bacteria (56)</i><br><i>Bacteria, Diatoms (51, 58)</i><br><i>Diatoms (55, 62) / Chlorophyta (55)</i><br><b>Diatoms (46, 58), Cyanobacteria, Bacteria (25, 51, 55, 59), Chlorophyta (59)</b><br><b>Diatoms, Bacteria (46, 51, 58)</b><br>Major or important fatty acid in various sources (25, 46, 51, 55, 57-59, 63)<br><b>Bacteria (56), Diatoms, Chlorophyta</b> |
|          |           | 20:5n-3              |          |                                                                                                                                                                                                                                                                                                                                                                                                                                                                                                                                                                                                                                                                                            |
| Sand     |           | 20:4n-6              |          |                                                                                                                                                                                                                                                                                                                                                                                                                                                                                                                                                                                                                                                                                            |
|          |           | 18:4n-6              |          |                                                                                                                                                                                                                                                                                                                                                                                                                                                                                                                                                                                                                                                                                            |
|          |           | 18:2n-6              |          |                                                                                                                                                                                                                                                                                                                                                                                                                                                                                                                                                                                                                                                                                            |
|          |           | 18:1n-9/18:3n-3      |          |                                                                                                                                                                                                                                                                                                                                                                                                                                                                                                                                                                                                                                                                                            |
|          |           | 18:1n-7              |          |                                                                                                                                                                                                                                                                                                                                                                                                                                                                                                                                                                                                                                                                                            |
|          |           | 17:1n-5/7            |          |                                                                                                                                                                                                                                                                                                                                                                                                                                                                                                                                                                                                                                                                                            |
|          |           | 17:0                 |          |                                                                                                                                                                                                                                                                                                                                                                                                                                                                                                                                                                                                                                                                                            |
|          |           | 16:3n-4/16:4n-3      |          |                                                                                                                                                                                                                                                                                                                                                                                                                                                                                                                                                                                                                                                                                            |
|          |           | 16:1n-7              |          |                                                                                                                                                                                                                                                                                                                                                                                                                                                                                                                                                                                                                                                                                            |
|          |           | 16:1n-5              |          |                                                                                                                                                                                                                                                                                                                                                                                                                                                                                                                                                                                                                                                                                            |
|          |           | 16:0                 |          |                                                                                                                                                                                                                                                                                                                                                                                                                                                                                                                                                                                                                                                                                            |
|          |           | 15:0                 |          |                                                                                                                                                                                                                                                                                                                                                                                                                                                                                                                                                                                                                                                                                            |
|          |           | 14:0                 | Sup.     | <b>Diatoms (58)</b><br><b>Dinoflagellates (55) *</b>                                                                                                                                                                                                                                                                                                                                                                                                                                                                                                                                                                                                                                       |
|          |           | 18:0                 |          |                                                                                                                                                                                                                                                                                                                                                                                                                                                                                                                                                                                                                                                                                            |
|          | Bound     | 15:0iso, 15:0anteiso | Aligned  | <b>Bacteria (53), Bacteria (3, 42, 51)</b>                                                                                                                                                                                                                                                                                                                                                                                                                                                                                                                                                                                                                                                 |
|          |           | 18:1n-7              | Sup.     | <b>Bacteria (3, 42, 50-52), Cyanobacteria, Chlorophyta, Diatoms (25, 46, 55)</b><br><b>Dinoflagellates (55) *</b><br>Major or important fatty acid in various sources (25, 46, 51, 55, 57-59, 63)<br><b>Bacteria (56), Diatoms, Chlorophyta</b><br><b>Diatoms (58)</b>                                                                                                                                                                                                                                                                                                                                                                                                                     |
| 18:0     |           |                      |          |                                                                                                                                                                                                                                                                                                                                                                                                                                                                                                                                                                                                                                                                                            |
|          |           | 16:0                 |          |                                                                                                                                                                                                                                                                                                                                                                                                                                                                                                                                                                                                                                                                                            |
|          |           | 15:0                 |          |                                                                                                                                                                                                                                                                                                                                                                                                                                                                                                                                                                                                                                                                                            |
|          |           | 14:0                 |          |                                                                                                                                                                                                                                                                                                                                                                                                                                                                                                                                                                                                                                                                                            |
|          |           |                      |          |                                                                                                                                                                                                                                                                                                                                                                                                                                                                                                                                                                                                                                                                                            |

\* also detected in all sources in trace amounts (25, 46, 51, 55-59, 61).
